# Supplementary material
Source: ML conference proceedings conference paper supplement (https://aclanthology.org/2022.naacl-main.168)
Supplement: software [file 2022.naacl-main.168.software.zip]

**Query Generation**  
via T5

**Negative Mining**  
via Dense Retrieval

**Pseudo Labeling**  
via Cross-Encoder

Python is  
...

What is Python

What is Python

Java is  
...

What is Python

10.3

Python is  
...

0.3

Java is  
...

6.2

2.0
